# Supplementary material for: Genetic and molecular characterization of H9N2 and H5 avian influenza viruses from live poultry markets in Zhejiang Province, eastern China
Source: PubMed Central journal article supplement (PMC4667249; doi:10.1038/srep17508), 2015-12-02
Supplement: srep17508-s1.pdf [file srep17508-s1.pdf]

**Genetic and molecular characterization of H9N2 and H5 avian influenza viruses  
from live poultry markets in Zhejiang Province, eastern China**

Haibo Wu<sup>1</sup>, Xiuming Peng<sup>1</sup>, Xiaorong Peng<sup>1</sup>, Linfang Cheng<sup>1</sup>, Xiangyun Lu<sup>1</sup>, Changzhong Jin<sup>1</sup>,  
Tiansheng Xie<sup>1</sup>, Hangping Yao<sup>1</sup>, and Nanping Wu<sup>1</sup>

1. State Key Laboratory for Diagnosis and Treatment of Infectious Diseases, Collaborative  
Innovation Center for Diagnosis and Treatment of Infectious Diseases, the First Affiliated Hospital,  
School of Medicine, Zhejiang University, 310003 Hangzhou, China

Nanping Wu, Corresponding author

State Key Laboratory for Diagnosis and Treatment of Infectious Diseases, Collaborative  
Innovation Center for Diagnosis and Treatment of Infectious Diseases, the First Affiliated Hospital,  
School of Medicine, Zhejiang University, 79 Qingchun Road, Hangzhou, Zhejiang, 310003, China.  
Tel: +86 571 8723 6580. Email: flwnp2013@163.com.

**Supplementary Material:**

**Figure legends:**

**Figure S1.** Percentage of avian influenza virus positive poultry swabs by month. Cloacal swabs  
samples were collected from live poultry markets in Zhejiang Province, eastern China from  
2013–2014. The percentages of the swabs that tested positive for avian influenza virus each month  
during the collection period are shown.

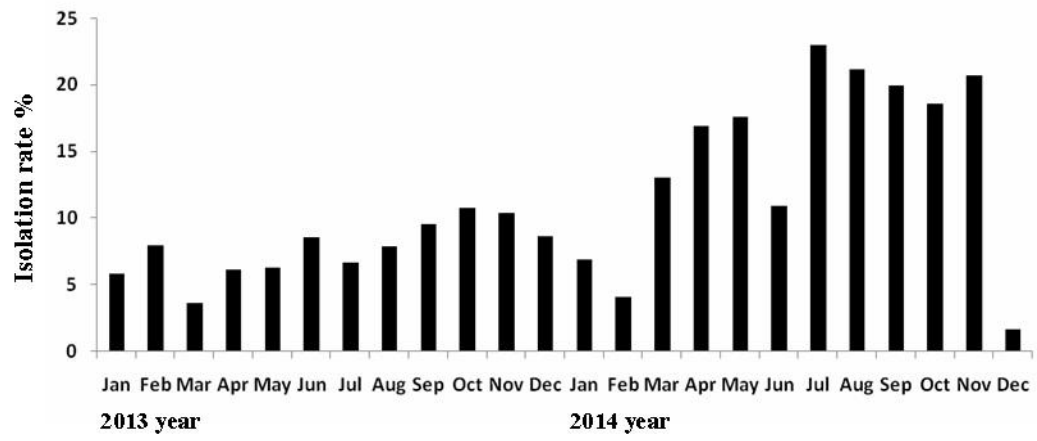

**Figure S2.** Phylogenetic analysis of the NA (N1, positions 1–1410; N2, 40–1340; N6, 40–1352; N8, 44–1352), PB2 (positions 1–2280), PB1 (positions 16–2268), PA (positions 1–2151), NP (positions: 1–1436), M (positions 29–923), and NS (positions 28–768) segments of the H5 avian influenza viruses compared to reference influenza viruses. The tree was created by the maximum likelihood method and bootstrapped with 1,000 replicates using the MEGA6 package. The H5 viruses from poultry in China identified in this study are highlighted by triangles. The non-H5 viruses from poultry in China identified in this study are highlighted by dots. Scale bar represents the distance unit between sequence pairs.

# N1 of H5

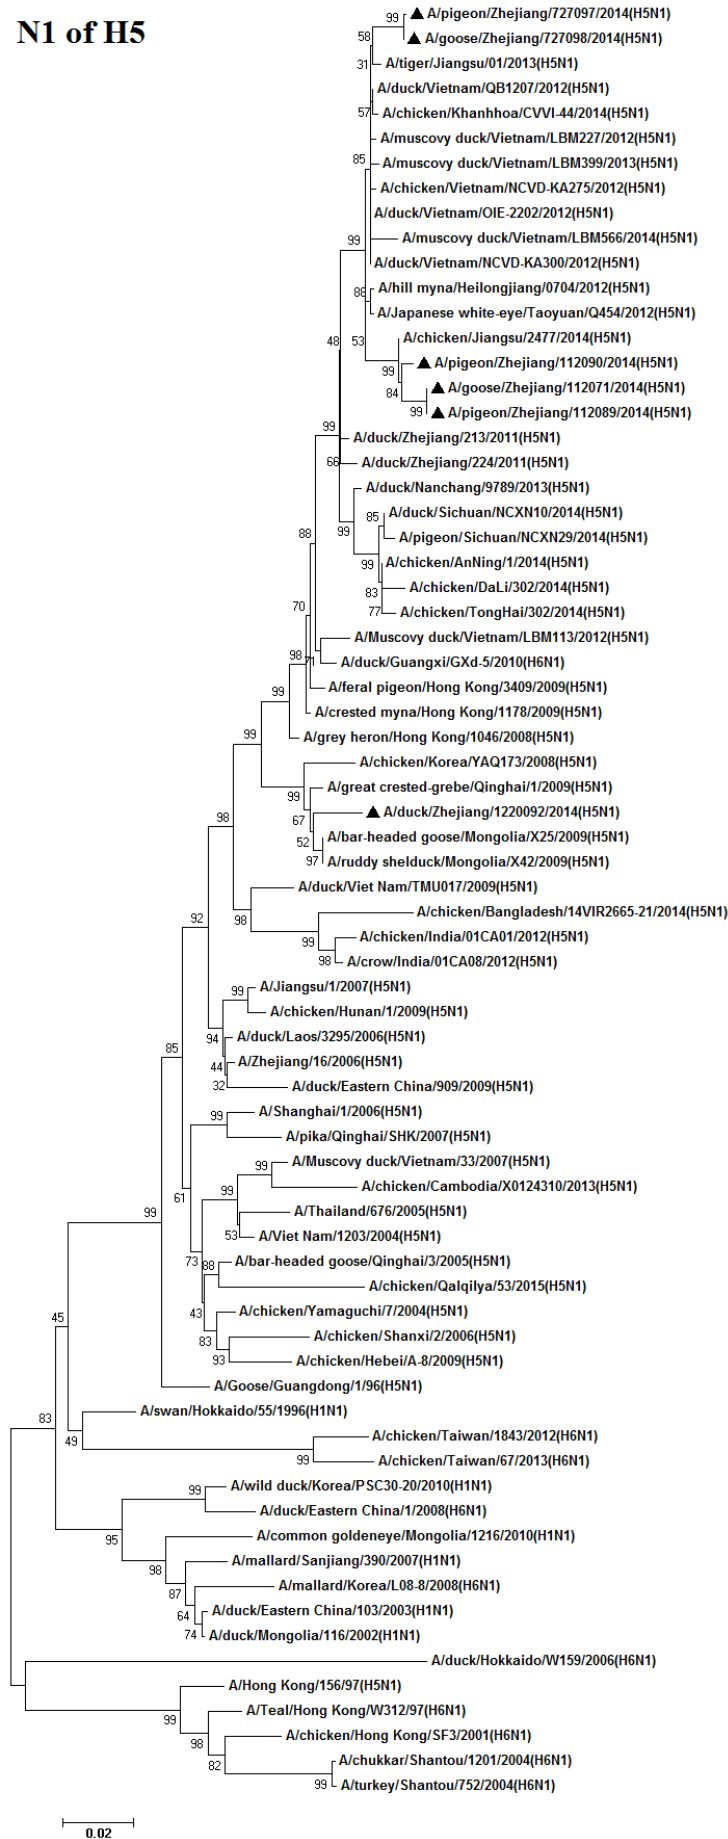

N2 of H5

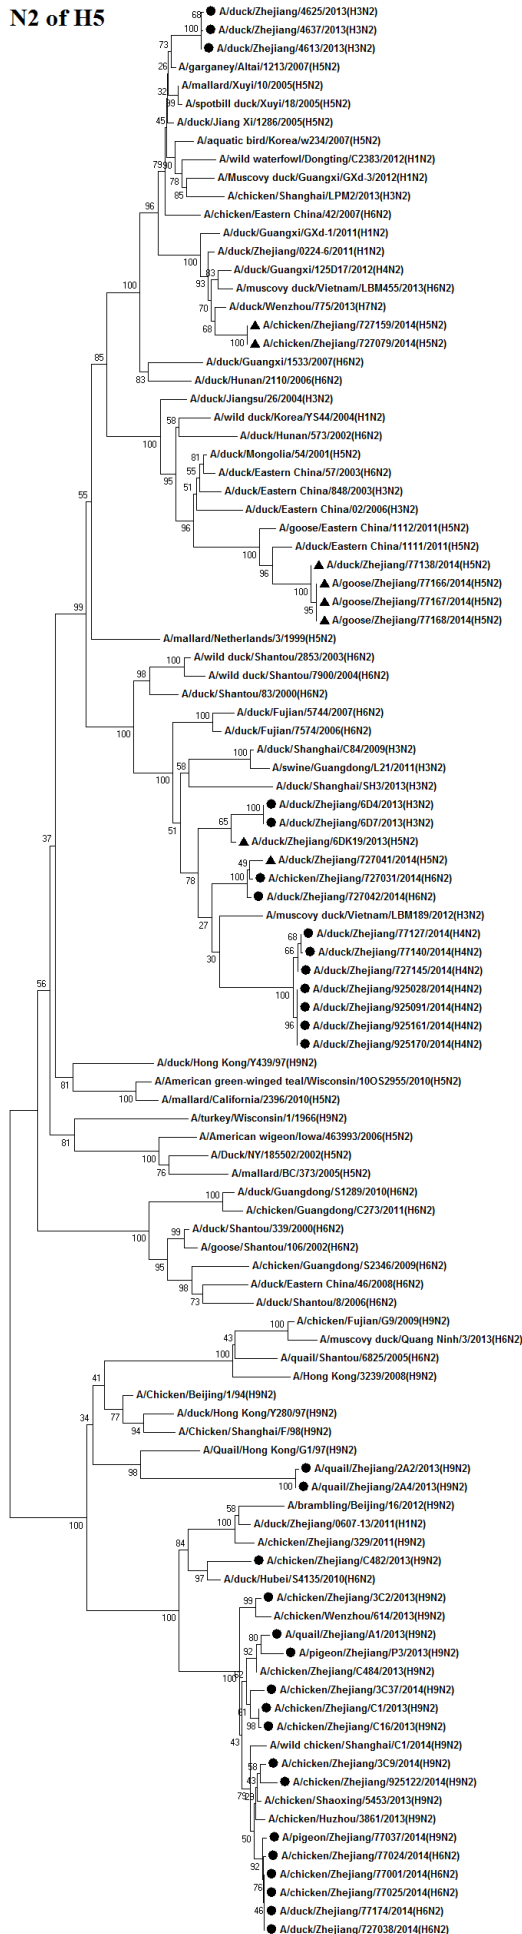

H9N2-like

# N6 of H5

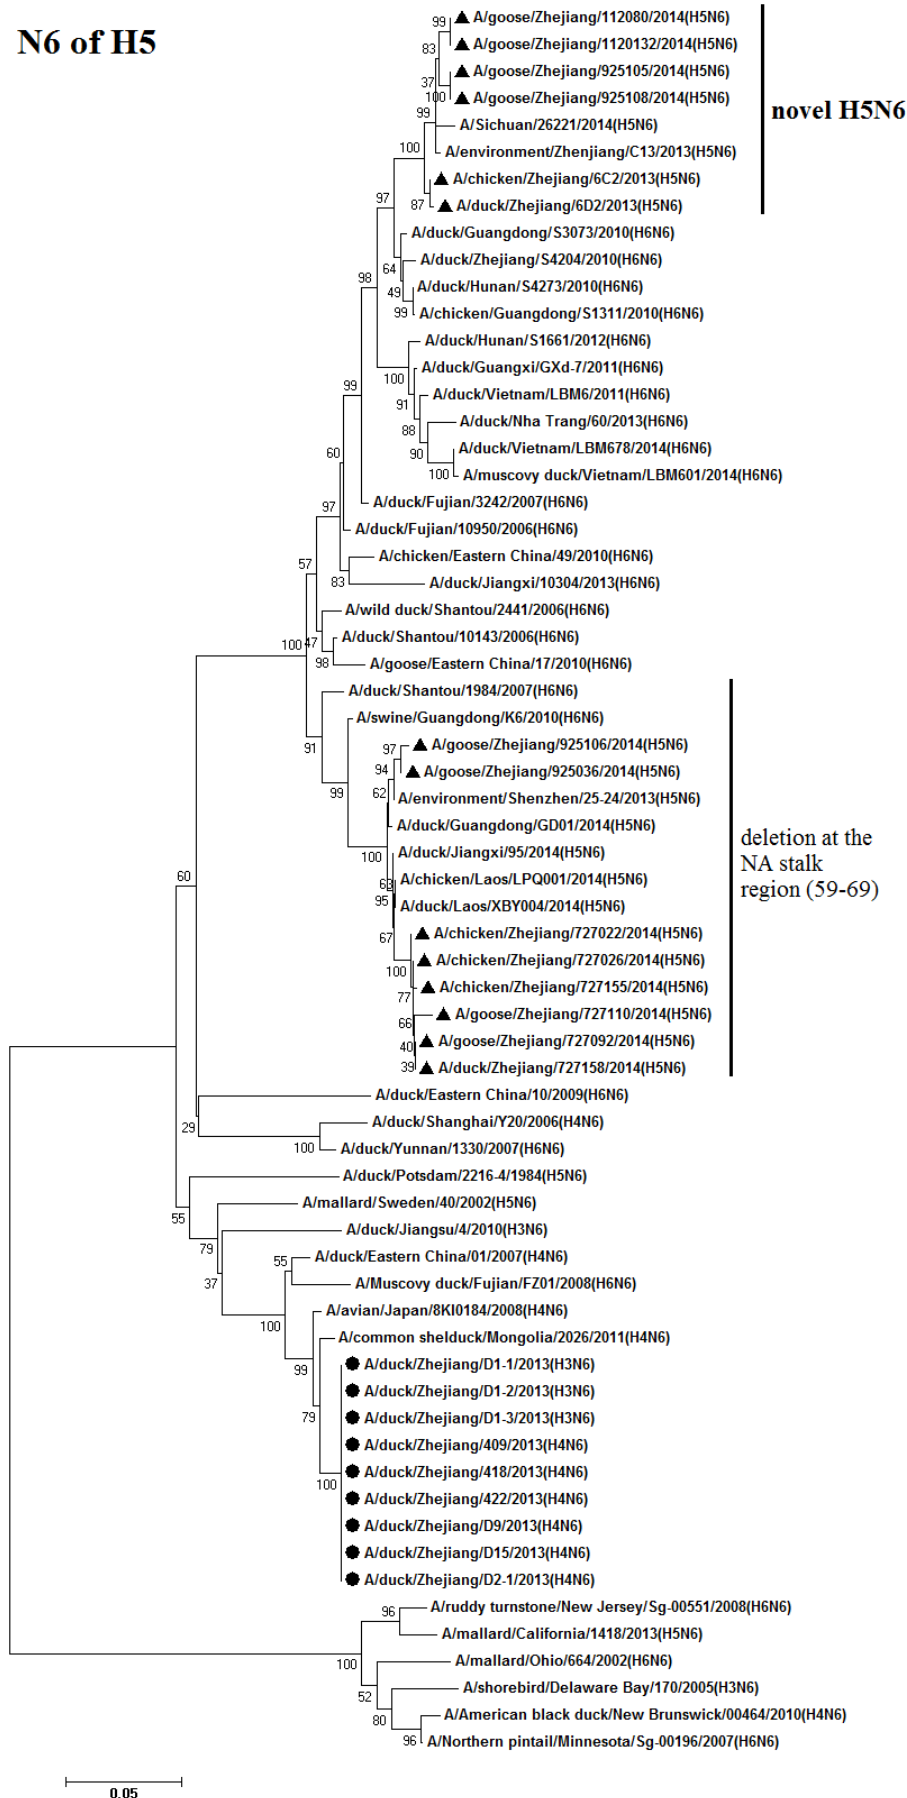

# N8 of H5

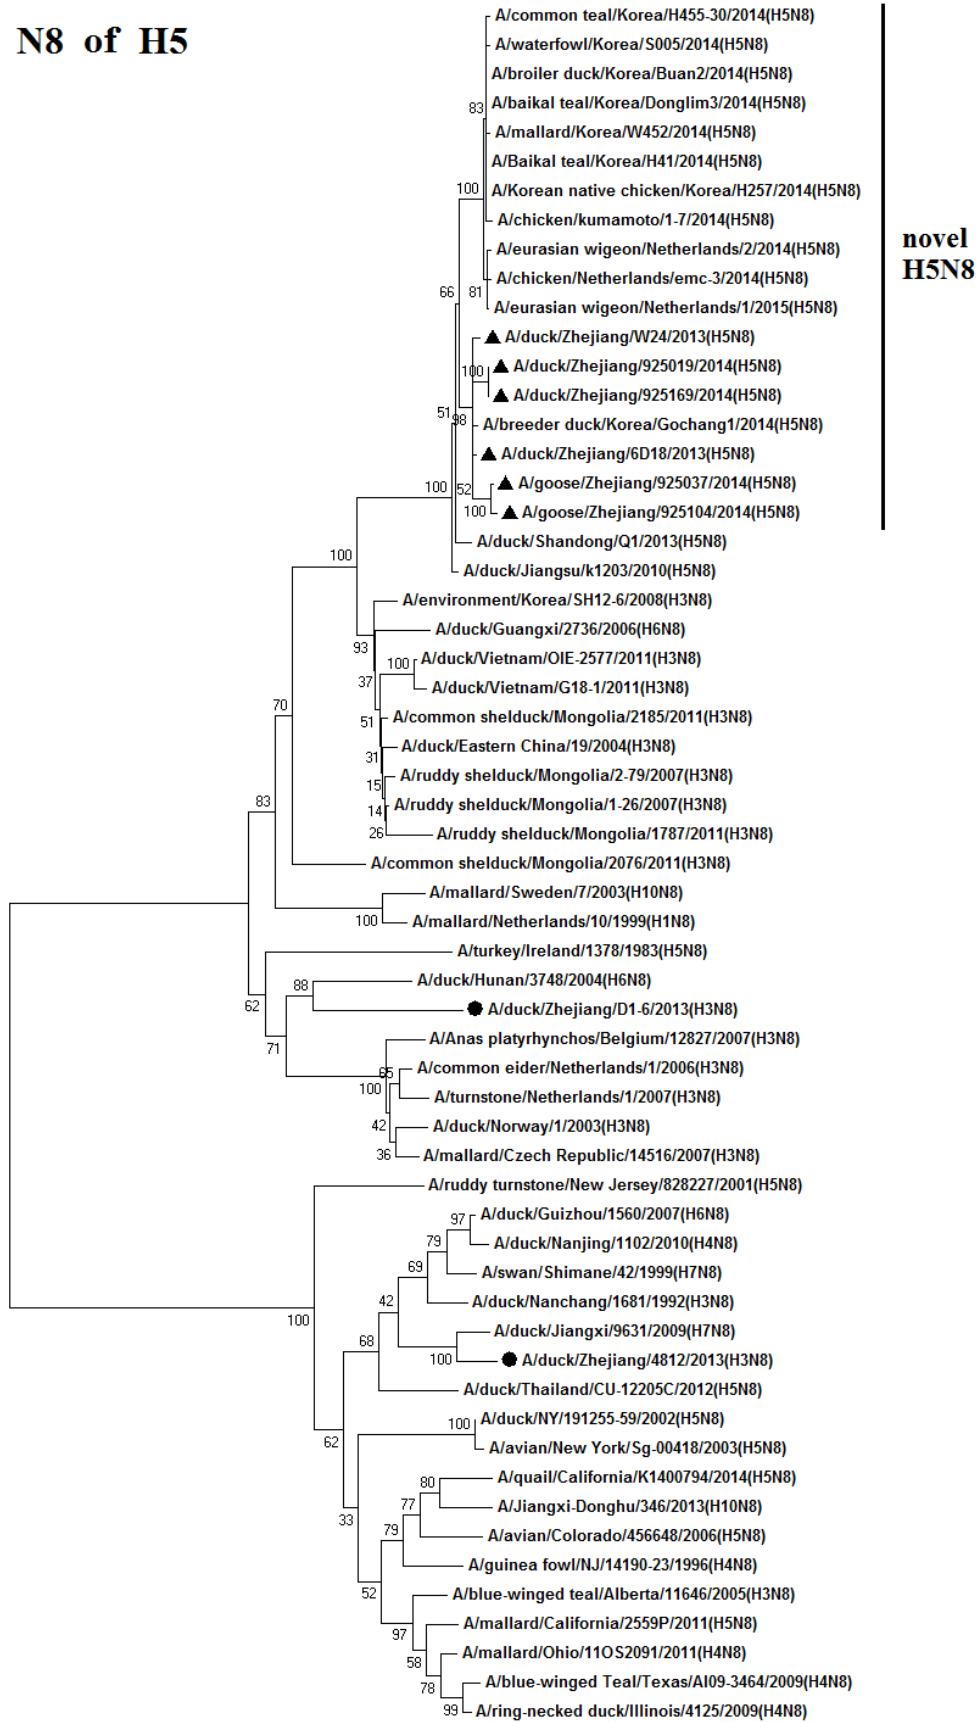

PB2 of H5

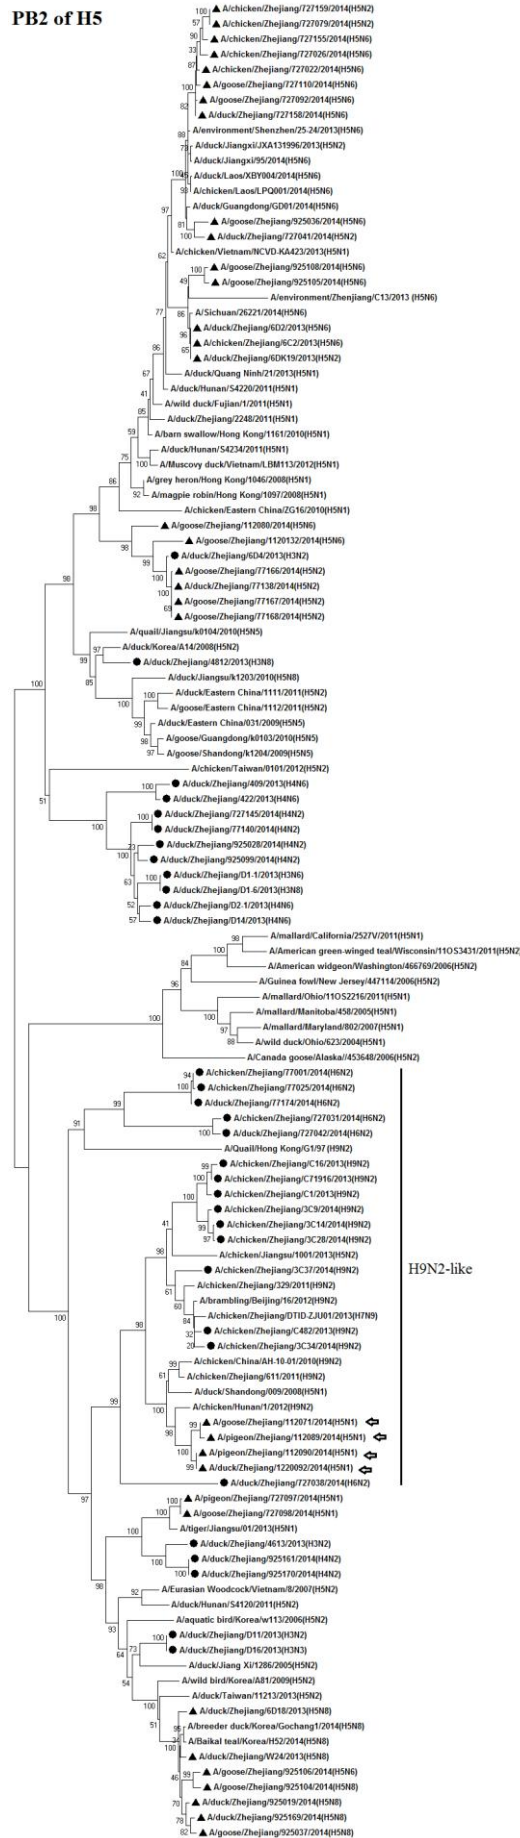



PB1 of H5

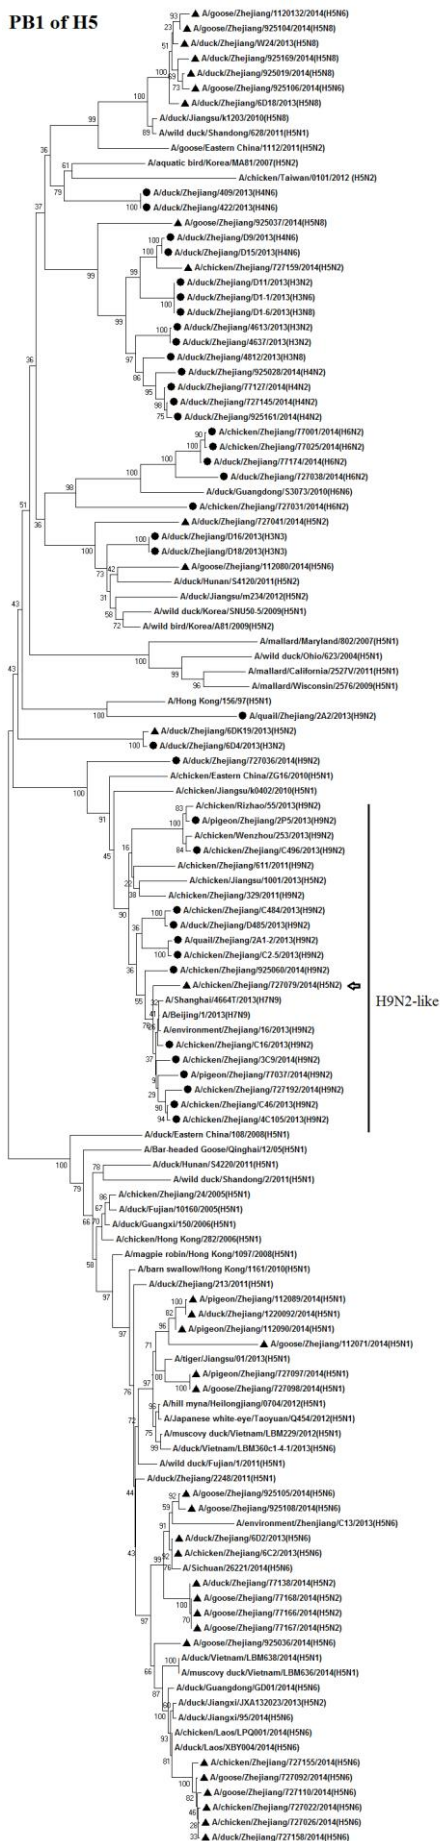

PA of H5

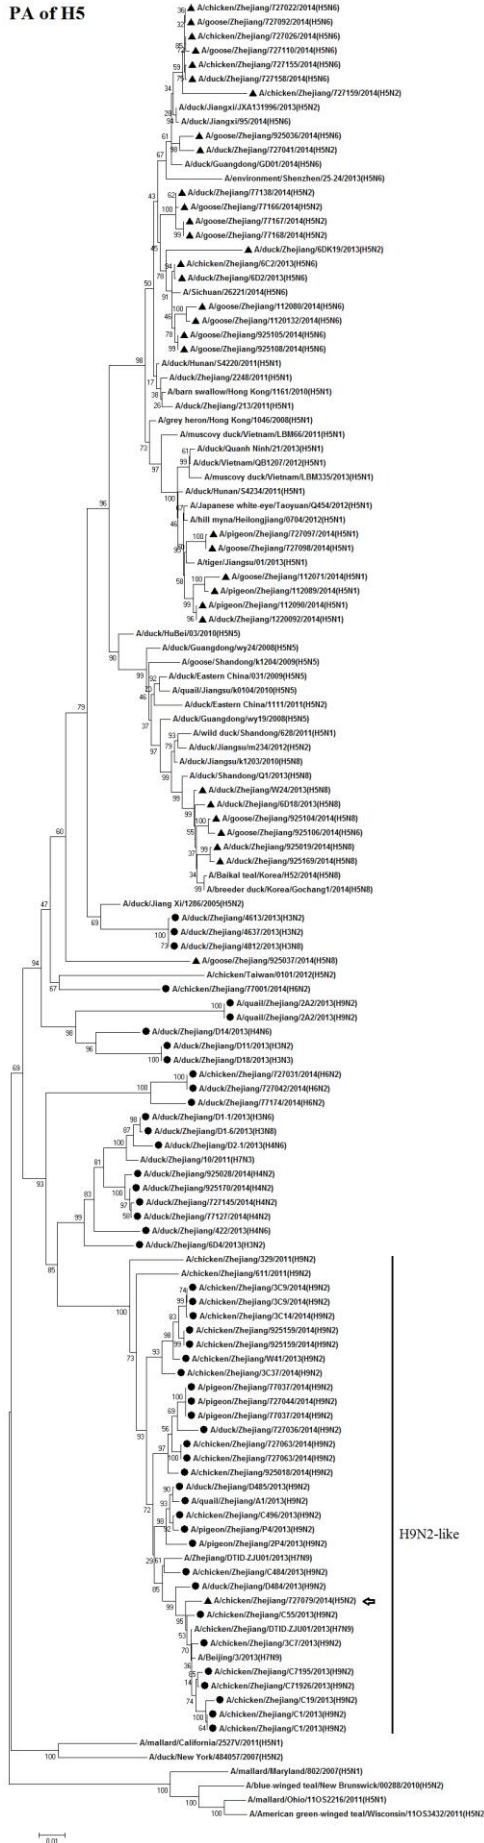

NP of H5

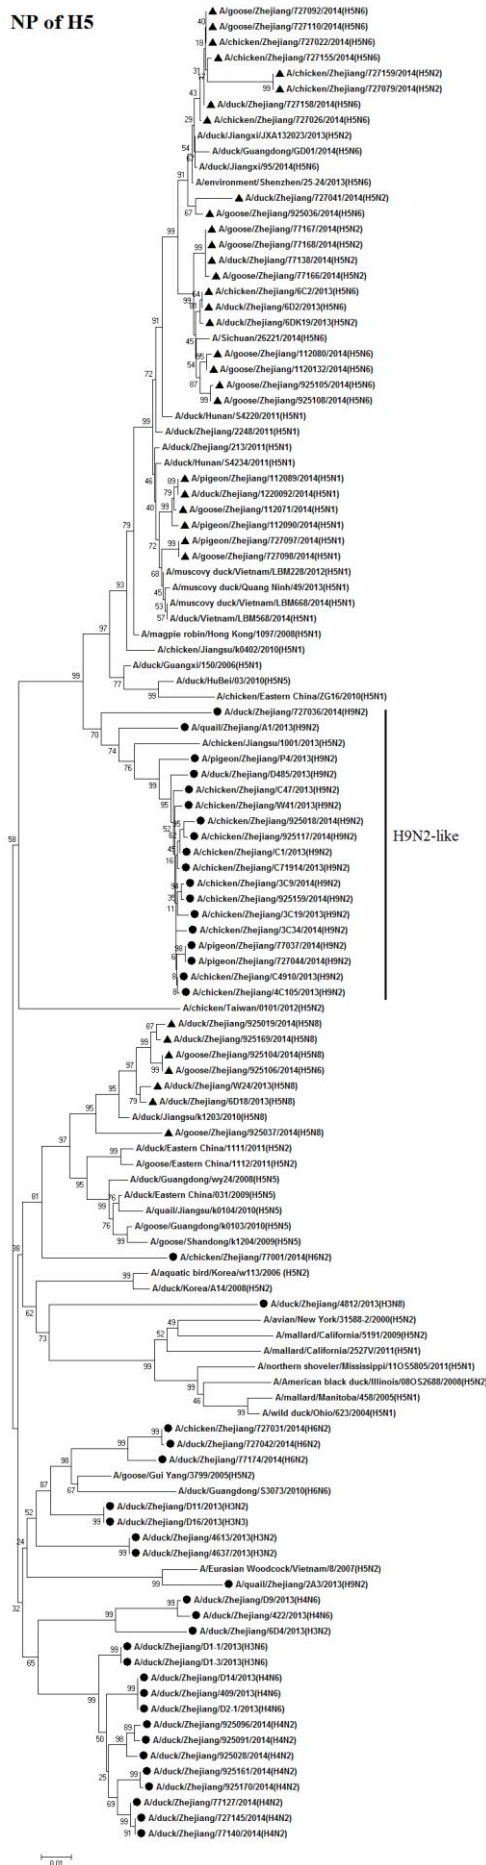

M of H5

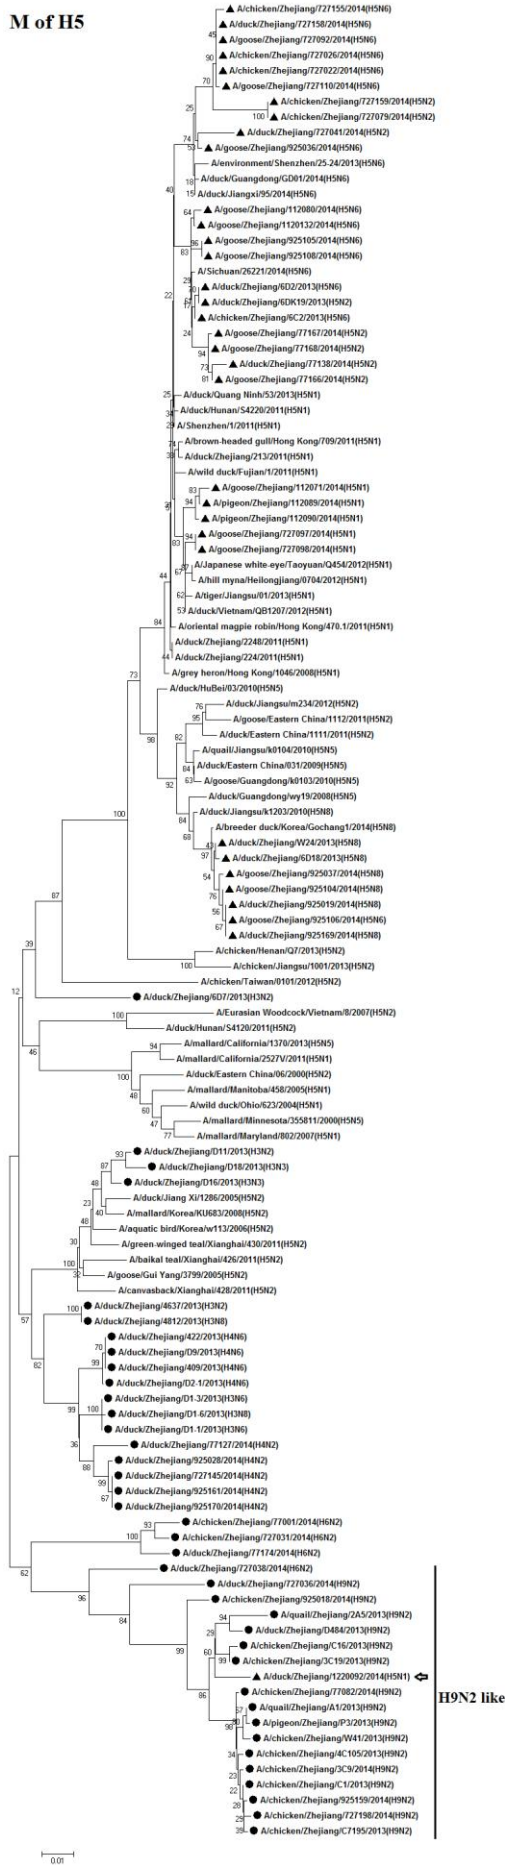

NS of H5

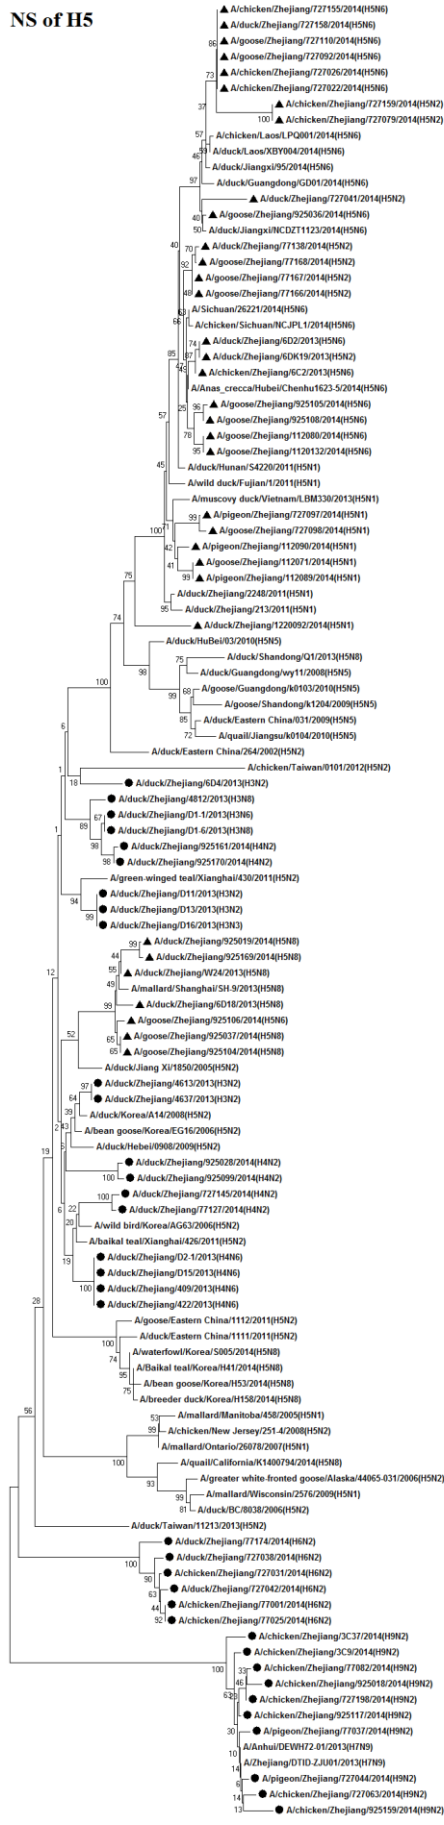

deletion of position  
80-84 in NS1

without  
deletion of position  
80-84 in NS1

H9N2-like

**Table S1.** Genotype descriptions of the classical reference viruses and H9N2 avian influenza virus field isolates

| Representative isolates <sup>a</sup> | Lineage <sup>b</sup> at the following gene segment |      |       |      |      |      |      |       | Genotypes |
|--------------------------------------|----------------------------------------------------|------|-------|------|------|------|------|-------|-----------|
|                                      | PB2                                                | PB1  | PA    | HA   | NP   | NA   | M    | NS    |           |
| CK/BJ/1/94                           | BJ94                                               | BJ94 | BJ94  | BJ94 | BJ94 | BJ94 | BJ94 | BJ94  | A         |
| CK/GD/6/97                           | G1                                                 | G1   | BJ94  | BJ94 | BJ94 | G9   | BJ94 | BJ94  | B         |
| CK/GX/10/99                          | G1                                                 | G1   | G1    | BJ94 | BJ94 | G9   | BJ94 | G1    | C         |
| CK/GX/9/99                           | G1                                                 | G1   | G1    | BJ94 | BJ94 | BJ94 | BJ94 | G1    | D         |
| CK/HLJ35//00                         | G1                                                 | G1   | G1    | Ws66 | Ws66 | G9   | BJ94 | BJ94  | E         |
| CK/GD/10/00                          | BJ94                                               | BJ94 | BJ94  | BJ94 | BJ94 | G9   | BJ94 | BJ94  | F         |
| CK/HN/26/00                          | G1                                                 | BJ94 | BJ94  | BJ94 | BJ94 | BJ94 | BJ94 | BJ94  | G         |
| CK/SH/F/98                           | SH98                                               | SH98 | SH98  | BJ94 | SH98 | BJ94 | BJ94 | BJ94  | H         |
| CK/GD/56/01                          | SH98                                               | SH98 | SH98  | BJ94 | SH98 | G9   | BJ94 | BJ94  | I         |
| CK/JS/1/99                           | SH98                                               | SH98 | SH98  | BJ94 | SH98 | BJ94 | BJ94 | HK76  | J         |
| CK/SD/1/03                           | BJ94                                               | BJ94 | Kor96 | BJ94 | BJ94 | BJ94 | BJ94 | BJ94  | K         |
| DK/Js/3/05                           | SH98                                               | SH98 | SH98  | BJ94 | SH98 | BJ94 | BJ94 | Kor96 | L         |
| CK/SD/B1/98                          | BJ94                                               | BJ94 | SH98  | BJ94 | BJ94 | BJ94 | BJ94 | BJ94  | M         |
| CK/SD/B2/07                          | BJ94                                               | SH98 | SH98  | BJ94 | SH98 | BJ94 | BJ94 | BJ94  | N         |
| CK/SD/B4/07                          | SH98                                               | SH98 | SH98  | BJ94 | SH98 | BJ94 | G1   | BJ94  | O         |
| CK/ZB/B1/08                          | SH98                                               | SH98 | SH98  | BJ94 | SH98 | G9   | G1   | BJ94  | P         |
| CK/HN/L1/08                          | SH98                                               | BJ94 | Y439  | BJ94 | SH98 | G9   | G1   | BJ94  | Q         |
| A/chicken/Zhejiang/C1/2013           | G1                                                 | SH98 | SH98  | BJ94 | SH98 | BJ94 | G1   | BJ94  | S         |

A/quail/Zhejiang/2A2/2013    G1    G1    Y439    BJ94    G1    G1    G1    G1    Novel

---

Note: Viruses were harvested during surveillance of live poultry markets in Zhejiang, China from January 2013 through December 2014.

<sup>a</sup> Genotypes of representative isolates were assigned as described previously <sup>7, 26, 27, 49</sup>.

<sup>b</sup> The lineage for each viral gene segment is coded as: BJ94= Ck/BJ/1/94-like genes; SH98= Ck/SH/F/98-like genes; G1= Qa/HK/G1/97-like genes; Y439= Dk/HK/Y439/97-like genes; HK76= DK/HK/d73/76-like genes; Kor96= Ck/Kor/323/96-like genes.

**Table S2.** Comparison of amino acid sequences of HA and NA genes of H9N2 avian influenza viruses isolated from poultry in Zhejiang, China.

| Representative isolates        | Amino acids at the receptor-binding sites |                      | Cleavage site<br>aa 333–340 | NA deletion<br>(aa) |
|--------------------------------|-------------------------------------------|----------------------|-----------------------------|---------------------|
|                                | Selected locations <sup>a</sup>           | Left edge aa 232–237 |                             |                     |
| A/chicken/Zhejiang/C1/2013     | YWTN <b>AL</b> Y                          | NGLMGR               | PSR <b>SS</b> R/GL          | 62–64               |
| A/chicken/Zhejiang/C19/2013    | YWTN <b>AL</b> Y                          | NGLMGR               | PSR <b>SS</b> R/GL          | 62–64               |
| A/chicken/Zhejiang/C71916/2013 | YWTN <b>AL</b> Y                          | NGLMGR               | PSR <b>SS</b> R/GL          | 62–64               |
| A/chicken/Zhejiang/C16/2013    | YWTN <b>T</b> LY                          | NGLMGR               | PS <b>K</b> SSR/GL          | 62–64               |
| A/chicken/Zhejiang/727198/2014 | YWTN <b>T</b> LY                          | NGLMGR               | PSR <b>SS</b> R/GL          | 62–64               |
| A/chicken/Zhejiang/925117/2014 | YWTN <b>T</b> LY                          | NGLMGR               | PSR <b>SS</b> R/GL          | 62–64               |
| A/quail/Zhejiang/2A5/2013      | YWTN <b>V</b> LY                          | NGLMGR               | PSR <b>SS</b> R/GL          | 62–64               |
| A/quail/Zhejiang/2A2/2013      | YWTN <b>T</b> LY                          | NGLMGR               | PSR <b>SS</b> R/GL          | 38–39               |
| A/quail/Zhejiang/2A3/2013      | YWTN <b>T</b> LY                          | NGLMGR               | PSR <b>SS</b> R/GL          | 38–39               |
| A/quail/Zhejiang/2A4/2013      | YWTN <b>T</b> LY                          | NGLMGR               | PSR <b>SS</b> R/GL          | 38–39               |
| Ck/BJ/1/94                     | YWTN <b>V</b> LY                          | NG <b>QQ</b> GR      | PAR <b>SS</b> R/GL          | NO                  |
| Ck/SH/F/98                     | YWTN <b>AL</b> Y                          | NG <b>QQ</b> GR      | PAR <b>SS</b> R/GL          | 62–64               |
| Qa/HK/ G1/97                   | YWT <b>HE</b> LY                          | NDL <b>Q</b> GR      | PAR <b>SS</b> R/GL          | 38–39               |
| Dk/HK/Y439/97                  | YWT <b>HE</b> LY                          | ND <b>QQ</b> GR      | PAAS <b>N</b> R/GL          | NO                  |
| Dk/HK/Y280/97                  | YWTN <b>T</b> LY                          | NGL <b>Q</b> GR      | PAR <b>SS</b> R/GL          | 62–64               |
| A/turkey/Wisconsin/1/1966      | YWT <b>HE</b> LY                          | NG <b>QQ</b> GR      | PA <b>V</b> SSR/GL          | NO                  |

Note: <sup>a</sup> From left to right, <sup>aa</sup> 109, 161, 163, 191, 198, 202, and 203.

Residues in ***bold italics*** indicate changes from the consensus alignment.



**Table S3.** Novel H5 avian influenza virus strains isolated from poultry.

| No. | Strain                               | Subtype | HA clade | District, city     | Date of sample collection | Species | H5 virus isolation rate (%) |
|-----|--------------------------------------|---------|----------|--------------------|---------------------------|---------|-----------------------------|
| 1   | A/pigeon/Zhejiang/727097/2014(H5N1)  | H5N1    | 2.3.2    | Yuhang, Hangzhou   | Jul 27, 2014              | pigeon  | 1.17%<br>(3/255)*           |
| 2   | A/pigeon/Zhejiang/112089/2014(H5N1)  | H5N1    | 2.3.2    | Haining, Jiaxing   | Nov 20, 2014              |         |                             |
| 3   | A/pigeon/Zhejiang/112090/2014(H5N1)  | H5N1    | 2.3.2    | Haining, Jiaxing   | Nov 20, 2014              |         |                             |
| 4   | A/chicken/Zhejiang/727079/2014(H5N2) | H5N2    | 2.3.4.6  | Yuhang, Hangzhou   | Jul 27, 2014              | chicken | 0.29%<br>(6/2031)           |
| 5   | A/chicken/Zhejiang/727159/2014(H5N2) | H5N2    | 2.3.4.6  | Yuhang, Hangzhou   | Jul 27, 2014              |         |                             |
| 6   | A/chicken/Zhejiang/6C2/2013(H5N6)    | H5N6    | 2.3.4.6  | Anji, Huzhou       | Dec 14, 2013              |         |                             |
| 7   | A/chicken/Zhejiang/727022/2014(H5N6) | H5N6    | 2.3.4.6  | Yuhang, Hangzhou   | Jul 27, 2014              |         |                             |
| 8   | A/chicken/Zhejiang/727026/2014(H5N6) | H5N6    | 2.3.4.6  | Yuhang, Hangzhou   | Jul 27, 2014              |         |                             |
| 9   | A/chicken/Zhejiang/727155/2014(H5N6) | H5N6    | 2.3.4.6  | Yuhang, Hangzhou   | Jul 27, 2014              |         |                             |
| 10  | A/duck/Zhejiang/1220092/2014(H5N1)   | H5N1    | 2.3.2    | Tongxiang, Jiaxing | Dec 25, 2014              | duck    | 1.07%<br>(10/929)           |
| 11  | A/duck/Zhejiang/6DK19/2013(H5N2)     | H5N2    | 2.3.4.6  | Yuhang, Hangzhou   | Dec 14, 2013              |         |                             |
| 12  | A/duck/Zhejiang/77138/2014(H5N2)     | H5N2    | 2.3.4.6  | Tongxiang, Jiaxing | Jul 7, 2014               |         |                             |
| 13  | A/duck/Zhejiang/727041/2014(H5N2)    | H5N2    | 2.3.4.6  | Yuhang, Hangzhou   | Jul 27, 2014              |         |                             |
| 14  | A/duck/Zhejiang/6D2/2013(H5N6)       | H5N6    | 2.3.4.6  | Anji, Huzhou       | Dec 14, 2013              |         |                             |
| 15  | A/duck/Zhejiang/727158/2014(H5N6)    | H5N6    | 2.3.4.6  | Yuhang, Hangzhou   | Jul 27, 2014              |         |                             |
| 16  | A/duck/Zhejiang/W24/2013(H5N8)       | H5N8    | 2.3.4.6  | Tongxiang, Jiaxing | Nov 14, 2013              |         |                             |
| 17  | A/duck/Zhejiang/6D18/2013(H5N8)      | H5N8    | 2.3.4.6  | Yuhang, Hangzhou   | Dec 14, 2013              |         |                             |
| 18  | A/duck/Zhejiang/925169/2014(H5N8)    | H5N8    | 2.3.4.6  | Deqing, Huzhou     | Sep 25, 2014              |         |                             |
| 19  | A/duck/Zhejiang/925019/2014(H5N8)    | H5N8    | 2.3.4.6  | Deqing, Huzhou     | Sep 25, 2014              |         |                             |

|    |                                     |      |         |                       |                 |       |                |
|----|-------------------------------------|------|---------|-----------------------|-----------------|-------|----------------|
| 20 | A/goose/Zhejiang/727098/2014(H5N1)  | H5N1 | 2.3.2   | Yuhang,<br>Hangzhou   | Jul<br>27,2014  | goose | 30%<br>(15/50) |
| 21 | A/goose/Zhejiang/112071/2014(H5N1)  | H5N1 | 2.3.2   | Haining,<br>Jiaxing   | Nov<br>20,2014  |       |                |
| 22 | A/goose/Zhejiang/77166/2014(H5N2)   | H5N2 | 2.3.4.6 | Tongxiang,<br>Jiaxing | Jul 7,<br>2014  |       |                |
| 23 | A/goose/Zhejiang/77167/2014(H5N2)   | H5N2 | 2.3.4.6 | Tongxiang,<br>Jiaxing | Jul 7,<br>2014  |       |                |
| 24 | A/goose/Zhejiang/77168/2014(H5N2)   | H5N2 | 2.3.4.6 | Tongxiang,<br>Jiaxing | Jul 7,<br>2014  |       |                |
| 25 | A/goose/Zhejiang/727092/2014(H5N6)  | H5N6 | 2.3.4.6 | Yuhang,<br>Hangzhou   | Jul 27,<br>2014 |       |                |
| 26 | A/goose/Zhejiang/727110/2014(H5N6)  | H5N6 | 2.3.4.6 | Yuhang,<br>Hangzhou   | Jul 27,<br>2014 |       |                |
| 27 | A/goose/Zhejiang/925105/2014(H5N6)  | H5N6 | 2.3.4.6 | Yuhang,<br>Hangzhou   | Sep 25,<br>2014 |       |                |
| 28 | A/goose/Zhejiang/925108/2014(H5N6)  | H5N6 | 2.3.4.6 | Yuhang,<br>Hangzhou   | Sep 25,<br>2014 |       |                |
| 29 | A/goose/Zhejiang/925106/2014(H5N6)  | H5N6 | 2.3.4.6 | Yuhang,<br>Hangzhou   | Sep 25,<br>2014 |       |                |
| 30 | A/goose/Zhejiang/925036/2014(H5N6)  | H5N6 | 2.3.4.6 | Yuhang,<br>Hangzhou   | Sep 25,<br>2014 |       |                |
| 31 | A/goose/Zhejiang/112080/2014(H5N6)  | H5N6 | 2.3.4.6 | Haining,<br>Jiaxing   | Nov 20,<br>2014 |       |                |
| 32 | A/goose/Zhejiang/1120132/2014(H5N6) | H5N6 | 2.3.4.6 | Haining,<br>Jiaxing   | Nov 20,<br>2014 |       |                |
| 33 | A/goose/Zhejiang/925037/2014(H5N8)  | H5N8 | 2.3.4.6 | Yuhang,<br>Hangzhou   | Sep 25,<br>2014 |       |                |
| 34 | A/goose/Zhejiang/925104/2014(H5N8)  | H5N8 | 2.3.4.6 | Yuhang,<br>Hangzhou   | Sep 25,<br>2014 |       |                |

Note: Viruses were harvested during surveillance of live poultry markets in Zhejiang, China from January 2013 through December 2014
